# Supplementary material
Source: MDPI journal article supplement (https://www.mdpi.com/2410-3888/9/4/143)
Supplement: s1 [file s1]

**Table S1.** Correlation between the morphology of *Saurida tumbil* and the rate of *Hysterothylacium* sp. infection in different seasons; Mean intensity was calculated for total number of larvae in infected fish.

| Season | Total no of nematodes | No of nematodes in visceral organs and muscle, respectively | No of infected fish/ no of examined fish (prevalence) |                    |                    |                 |                  | Mean intensity |
|--------|-----------------------|-------------------------------------------------------------|-------------------------------------------------------|--------------------|--------------------|-----------------|------------------|----------------|
|        |                       |                                                             | All fish                                              | 30–40 cm long fish | 41–50 cm long fish | 470–800 gm fish | 800–1030 gm fish |                |
| Spring | 917                   | 731, 186                                                    | 108/111 (97.3)                                        | 54/55 (98.2)       | 54/56 (96.4)       | 55/56 (98.2)    | 53/55 (96.4)     | 8.5            |
| Summer | 978                   | 704, 274                                                    | 120/123 (97.6)                                        | 57/60 (95.0)       | 63/63 (100)        | 65/68 (95.6)    | 55/55 (100)      | 8.2            |
| Autumn | 2278                  | 1755, 523                                                   | 74/94 (78.7)                                          | 42/49 (85.7)       | 32/45 (71.1)       | 46/59 (78.0)    | 28/35 (80.0)     | 30.8           |
| Winter | 1959                  | 1590, 369                                                   | 128/130 (98.6)                                        | 93/93 (100)        | 35/37 (94.6)       | 95/96 (99.0)    | 33/34 (97.0)     | 15.2           |
| Total  | 6132                  | 4780, 1352                                                  | 430/458 (93.9)                                        | 246/257 (95.7)     | 184/201 (91.5)     | 261/279 (93.5)  | 169/179 (94.4)   | 14.3           |
